# Supplementary material
Source: ML conference proceedings conference paper supplement (https://openaccess.thecvf.com/content/CVPR_2019/html/Kampffmeyer_Rethinking_Knowledge_Graph_CVPR_2019_paper.html)
Supplement: Supplementary file 1 [file Kampffmeyer_Rethinking_Knowledge_Graph_CVPR_2019_supplemental.pdf]

# Rethinking Knowledge Graph Propagation for Zero-Shot Learning

## Supplementary Materials

Michael Kampffmeyer<sup>\*1</sup>, Yinbo Chen<sup>\*2</sup>, Xiaodan Liang<sup>3</sup>, Hao Wang<sup>4</sup>, Yujia Zhang<sup>5</sup>, and Eric P. Xing<sup>6</sup>

<sup>1</sup>UiT The Arctic University of Norway, <sup>2</sup>Tsinghua University, <sup>3</sup>Sun Yat-sen University, <sup>4</sup>Massachusetts Institute of Technology, <sup>5</sup>Institute of Automation, Chinese Academy of Sciences, <sup>6</sup>Carnegie Mellon University

### 1. Additional Qualitative Examples

Figure 1 and 2 provide further qualitative results of our single-hidden-layer GCN (SGCN) and Dense Graph Propagation Module (DGP) compared to a standard ResNet and GCNZ, our reimplementation of [6].

### 2. Performance improvements between GCNZ and SGCN

Table 1 explains the performance difference between our SGCN, our reimplementation of GCNZ and the reported results in [6]. Note, unless otherwise stated training is performed for 3000 epochs. Non-symmetric normalization ( $D^{-1}A$ ) is denoted as *non-sym* in the normalization column, while a symmetric normalization ( $D^{-1/2}AD^{-1/2}$ ) is denoted as *sym*. No finetuning has been performed for SGCN in these results.

Table 1: Illustration of the improvements between the original results of GCNZ in [6], our reimplementation of GCNZ and our SGCN. GCNZ<sup>†</sup> corresponds to updated results from [6] (taken from <https://github.com/JudyYe/zero-shot-gcn>). GCNZ<sup>‡</sup> is our reimplementation of [6].

| Model                              | Norm    | Hit@k (%) |      |      |      |      |
|------------------------------------|---------|-----------|------|------|------|------|
|                                    |         | 1         | 2    | 5    | 10   | 20   |
| GCNZ (300 epochs) [6]              | sym     | 19.8      | 33.3 | 53.2 | 65.4 | 74.6 |
| GCNZ <sup>†</sup> (300 epochs) [6] | sym     | 21.0      | 33.7 | 52.7 | 64.8 | 74.3 |
| GCNZ <sup>‡</sup> (300 epochs)     | sym     | 21.4      | 34.7 | 54.3 | 67.5 | 77.6 |
| GCNZ <sup>‡</sup>                  | sym     | 23.5      | 36.9 | 56.5 | 68.8 | 78.0 |
| SGCN (ours)                        | sym     | 24.6      | 38.1 | 57.6 | 70.0 | 79.7 |
| SGCN (ours)                        | non-sym | 24.8      | 38.3 | 57.5 | 69.9 | 79.6 |

\*Indicates equal contribution.

### 3. Performance on AWA2

AWA2 is a replacement for the original AWA dataset and represents more traditional zero-shot learning datasets, where most approaches rely on class-attribute information. It consists of 50 animal classes, with a total of 37,322 images and an average of 746 per class. The dataset further consists of 85-attribute features per class. We report results on the proposed split in [7] to ensure that there is no overlap between the test classes and the ImageNet 2012 dataset. In the proposed split, 40 classes are used for training and 10 for testing. AWA2 test classes are contained in the 21K ImageNet classes and several of the training classes (24 out of 40) that are in the proposed split overlap with the ImageNet 2012 dataset. We, therefore, use a unified approach for both datasets.

Results for the AWA2 dataset are presented in Table 2. Note that our model differs considerably from the baselines as it does not make use of the attributes provided in the dataset. To illustrate the merits of our approach, we re-implement [6], as it represents the method which is closest related to our approach and also makes use of word embeddings and a knowledge graph. We observe that our methods also outperforms [6], however, the improvement is lower than on the ImageNet dataset, which we believe is due to the arguably simpler task with the number of classes being considerably lower. Note, all methods, except SYNC, use a pretrained network trained on the 1K ImageNet classes. GCNZ and our DGP do not make use of the attribute information supplied for AWA2, however, both methods use the ImageNet knowledge graph.

### 4. Comparison to Graph Attention Networks

Table 3 illustrates the results for a 1-hidden-layer and 2-hidden-layer GCN with the attention mechanism proposed in GAT [5]. Note, performance degrades compared to a 1-hidden-layer GCN (i.e. SGCN(-f)). The hidden dimension

Table 2: Top-1 accuracy results for unseen classes on AWA2. Results for ConSE, Devise and SYNC obtained from [7].

| Model            | ACC (%)     |
|------------------|-------------|
| ConSE [4]        | 44.5        |
| Devise [2]       | 59.7        |
| SYNC [1]         | 46.6        |
| SE-GZSL [3]      | 69.2        |
| Gaussian-Ort [8] | 70.5        |
| GCNZ [6]         | 70.7        |
| DGP (ours)       | <b>77.3</b> |

is 2048 and training settings are the same as in the paper.

Table 3: Accuracy on ImageNet for a 1- and 2-hidden-layer GAT [5] compared to a 1-hidden-layer GCN without attention.

| Test set | Model        | Hit@k (%)   |             |             |             |             |
|----------|--------------|-------------|-------------|-------------|-------------|-------------|
|          |              | 1           | 2           | 5           | 10          | 20          |
| 2-hops   | GAT-1        | 24.1        | 37.5        | 57.2        | 69.7        | 79.4        |
|          | GAT-2        | 23.3        | 36.9        | 56.8        | 68.7        | 77.9        |
|          | GCN-1 (ours) | <b>24.8</b> | <b>38.3</b> | <b>57.5</b> | <b>69.9</b> | <b>79.6</b> |

## References

- [1] S. Changpinyo, W.-L. Chao, B. Gong, and F. Sha. Synthesized classifiers for zero-shot learning. In *Proceedings of the IEEE Conference on Computer Vision and Pattern Recognition*, pages 5327–5336, 2016. 2
- [2] A. Frome, G. S. Corrado, J. Shlens, S. Bengio, J. Dean, T. Mikolov, et al. Devise: A deep visual-semantic embedding model. In *Advances in Neural Information Processing Systems*, pages 2121–2129, 2013. 2
- [3] V. Kumar Verma, G. Arora, A. Mishra, and P. Rai. Generalized zero-shot learning via synthesized examples. In *CVPR*, 2018. 2
- [4] M. Norouzi, T. Mikolov, S. Bengio, Y. Singer, J. Shlens, A. Frome, G. S. Corrado, and J. Dean. Zero-shot learning by convex combination of semantic embeddings. *International Conference for Learning Representation*, 2014. 2
- [5] P. Velickovic, G. Cucurull, A. Casanova, A. Romero, P. Lio, and Y. Bengio. Graph attention networks. *ICLR*, 2018. 1, 2
- [6] X. Wang, Y. Ye, and A. Gupta. Zero-shot recognition via semantic embeddings and knowledge graphs. In *The IEEE Conference on Computer Vision and Pattern Recognition (CVPR)*, June 2018. 1, 2
- [7] Y. Xian, C. H. Lampert, B. Schiele, and Z. Akata. Zero-shot learning—a comprehensive evaluation of the good, the bad and the ugly. *IEEE transactions on pattern analysis and machine intelligence*, 2018. 1, 2
- [8] H. Zhang and P. Koniusz. Zero-shot kernel learning. In *CVPR*, 2018. 2

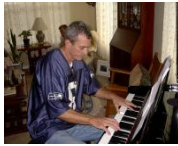

ResNet: upright, grand piano, organ, accordion, barbershop  
GCNZ: piano, spinet, keyboard instrument, concert grand, **baby grand**  
SGCN: piano, spinet, concert grand, **baby grand**, keyboard instrument  
DGP: piano, **baby grand**, concert grand, spinet, keyboard instrument

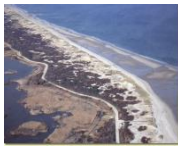

ResNet: breakwater, aircraft carrier, seashore, wing, sandbar  
GCNZ: barrier, **bar**, shore, grate, geological formation  
SGCN: littoral, **bar**, seaside, barrier, landfall,  
DGP: **bar**, littoral, shore, seaside, landfall

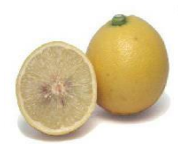

ResNet: lemon, orange, banana, spaghetti squash, fig  
GCNZ: **bitter orange**, temple orange, citrus, sweet orange, edible fruit  
SGCN: citrus, **bitter orange**, temple orange, sweet orange, edible fruit,  
DGP: citrus, **bitter orange**, sweet orange, temple orange, edible fruit

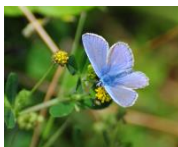

ResNet: lycaenid, cabbage butterfly, ringlet, sulphur butterfly, damselfly  
GCNZ: pierid, small white, large white, hairstreak, southern cabbage butterfly  
SGCN: **blue**, hairstreak, copper, pierid, butterfly,  
DGP: **blue**, hairstreak, copper, pierid, butterfly

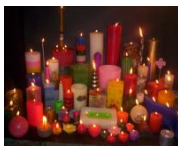

ResNet: candle, altar, lighter, lipstick, perfume  
GCNZ: vigil light, rushlight, **chandlery**, dip, lamp  
SGCN: vigil light, rushlight, **chandlery**, dip, high altar  
DGP: vigil light, **chandlery**, rushlight, dip, flambeau

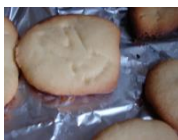

ResNet: bagel, french loaf, cheeseburger, dough, hotdog  
GCNZ: onion bagel, bun, loaf of bread, **cracker**, bread dough  
SGCN: onion bagel, bun, bread dough, pastry, sandwich  
DGP: bun, onion bagel, bread dough, **cracker**, pastry

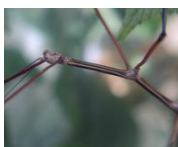

ResNet: walking stick, jacamar, hip, house finch, chainlink fence  
GCNZ: **diapheromera**, phasmid, finch, oscine, praying mantis  
SGCN: **diapheromera**, phasmid, neuropteran, thrush, finch  
DGP: **diapheromera**, phasmid, thrush, titmouse, oscine

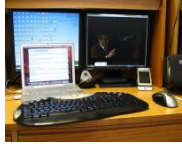

ResNet: desktop computer, monitor, screen, computer keyboard, mouse  
GCNZ: personal computer, portable computer, planner, computer, computer screen  
SGCN: personal computer, computer, computer screen, **display**, television monitor  
DGP: personal computer, background, computer screen, portable computer, **display**

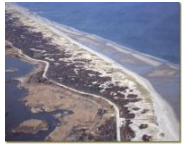

ResNet: bittern, partridge, coucal, ruffed grouse, kite  
GCNZ: least bittern, american bittern, **europaean bittern**, phasianid, crow pheasant  
SGCN: american bittern, **europaean bittern**, least bittern, plain turkey, great bustard  
DGP: american bittern, least bittern, **europaean bittern**, heron, egret

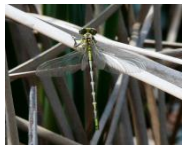

ResNet: damselfly, dragonfly, lacewing, walking stick, grasshopper  
GCNZ: **odonate**, neuropteran, hymenopterous insect, phasmid, brown lacewing  
SGCN: **odonate**, neuropteran, brown lacewing, green lacewing, phasmid  
DGP: **odonate**, brown lacewing, green lacewing, neuropteran, phasmid

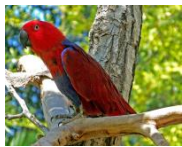

ResNet: macaw, lorikeet, bee eater, sulphur-crested cockatoo, house finch  
GCNZ: lory, **parrot**, rainbow lorikeet, varied lorikeet, cockatoo  
SGCN: **parrot**, lory, rainbow lorikeet, varied lorikeet, cockatoo  
DGP: lory, **parrot**, cockatoo, rainbow lorikeet, varied lorikeet

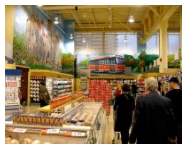

ResNet: grocery store, confectionery, tobacco shop, restaurant, butcher shop  
GCNZ: marketplace, greengrocery, **supermarket**, shop, tuck shop  
SGCN: **supermarket**, marketplace, greengrocery, tuck shop, shop  
DGP: **supermarket**, greengrocery, marketplace, tuck shop, shop

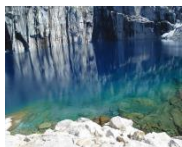

ResNet: cliff, valley, lakeside, alp, promontory  
GCNZ: geological formation, natural elevation, natural depression, mountain, ravine  
SGCN: **precipice**, crag, natural depression, ravine, natural elevation  
DGP: natural depression, geological formation, natural elevation, crag, **precipice**

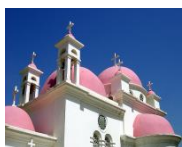

ResNet: church, monastery, dome, bell cote, mosque  
GCNZ: kirk, cathedral, abbey, basilica, cathedral  
SGCN: abbey, cathedral, friary, basilica, cathedral  
DGP: cathedral, abbey, cathedral, basilica, kirk

true label: **place\_of\_worship**
